# Supplementary material for: Self-propelling bacteria-based magnetic nanoparticles (BacMags) for targeted magnetic hyperthermia therapy against hypoxic tumors
Source: Royal Society of Chemistry journal article supplement (doi:10.1039/d3nr05082c), 2024-01-01
Supplement: d3nr05082c1.pdf [file d3nr05082c1.pdf]

**Supporting Information for**  
**Self-Propelling Bacteria-Based Magnetic Nanoparticles (BacMags) for Magnetic**  
**Hyperthermia Therapy targeting Hypoxic Tumors**

Tashmeen Kaur<sup>a</sup> and Deepika Sharma<sup>\*a</sup>

<sup>a</sup>Institute of Nano Science and Technology, Knowledge City, Sector 81, Mohali, Punjab-140306, India

**\*Corresponding Author**

deepika@inst.ac.in

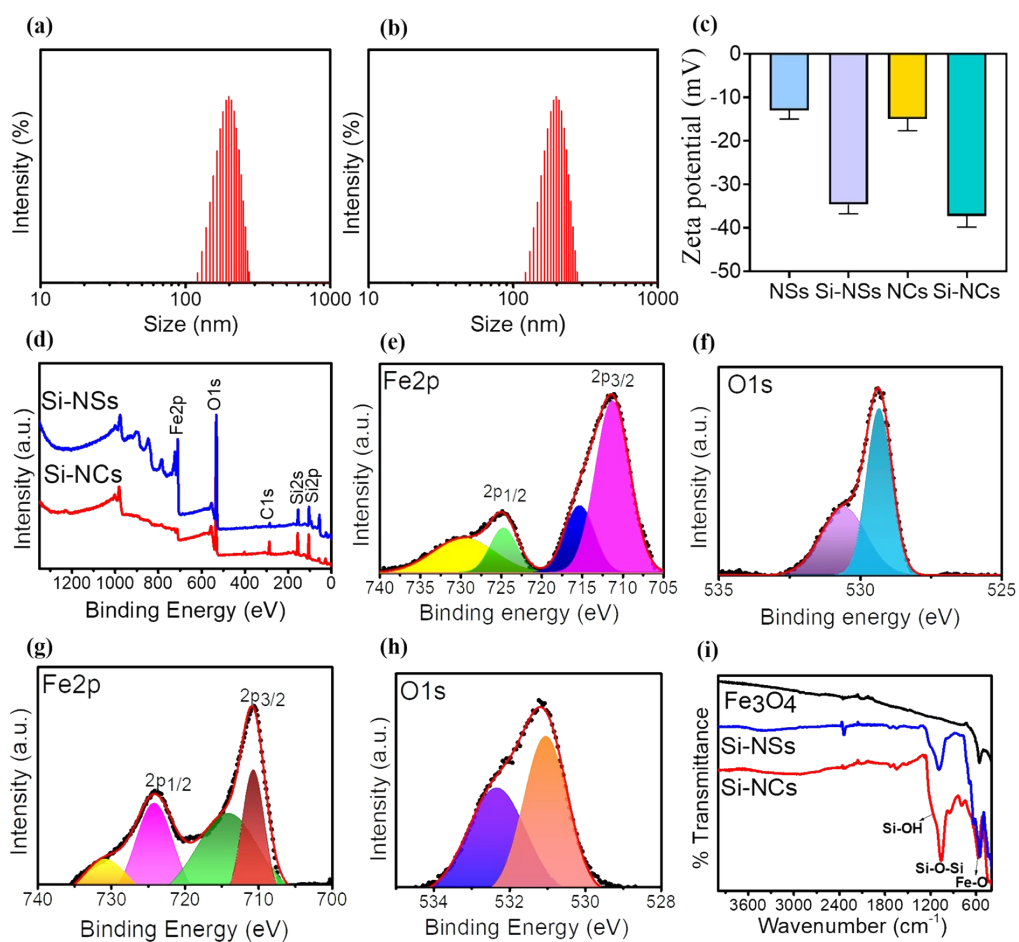

**Figure S1.** (a-b) Dynamic light scattering measurements of Si-NSs and Si-NCs respectively; (c) Zeta potential of the synthesised MNPs before and after silica coating; (d) XPS survey spectrum of Si-NSs and Si-NCs; (e, g) high resolution XPS spectra of Fe2p and (f, h) O1s of Si-NSs and Si-NCs respectively; (i) FTIR plot of uncoated Fe<sub>3</sub>O<sub>4</sub> and silica coated MNPs.

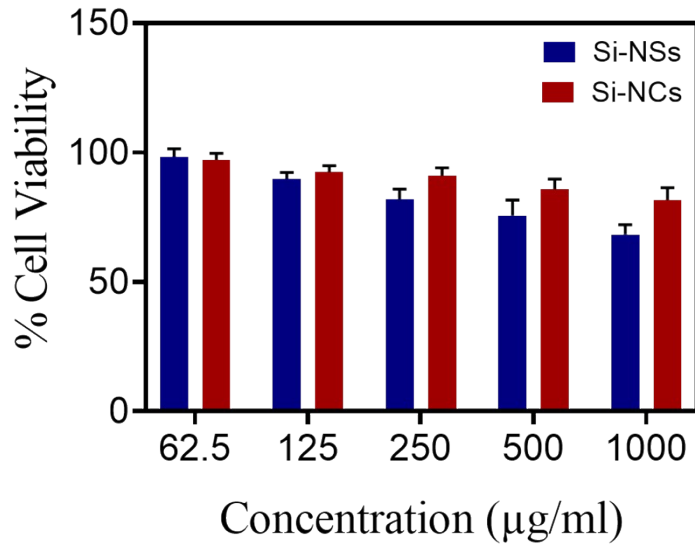

**Figure S2.** Biocompatibility analysis of Si-NSs and Si-NCs.

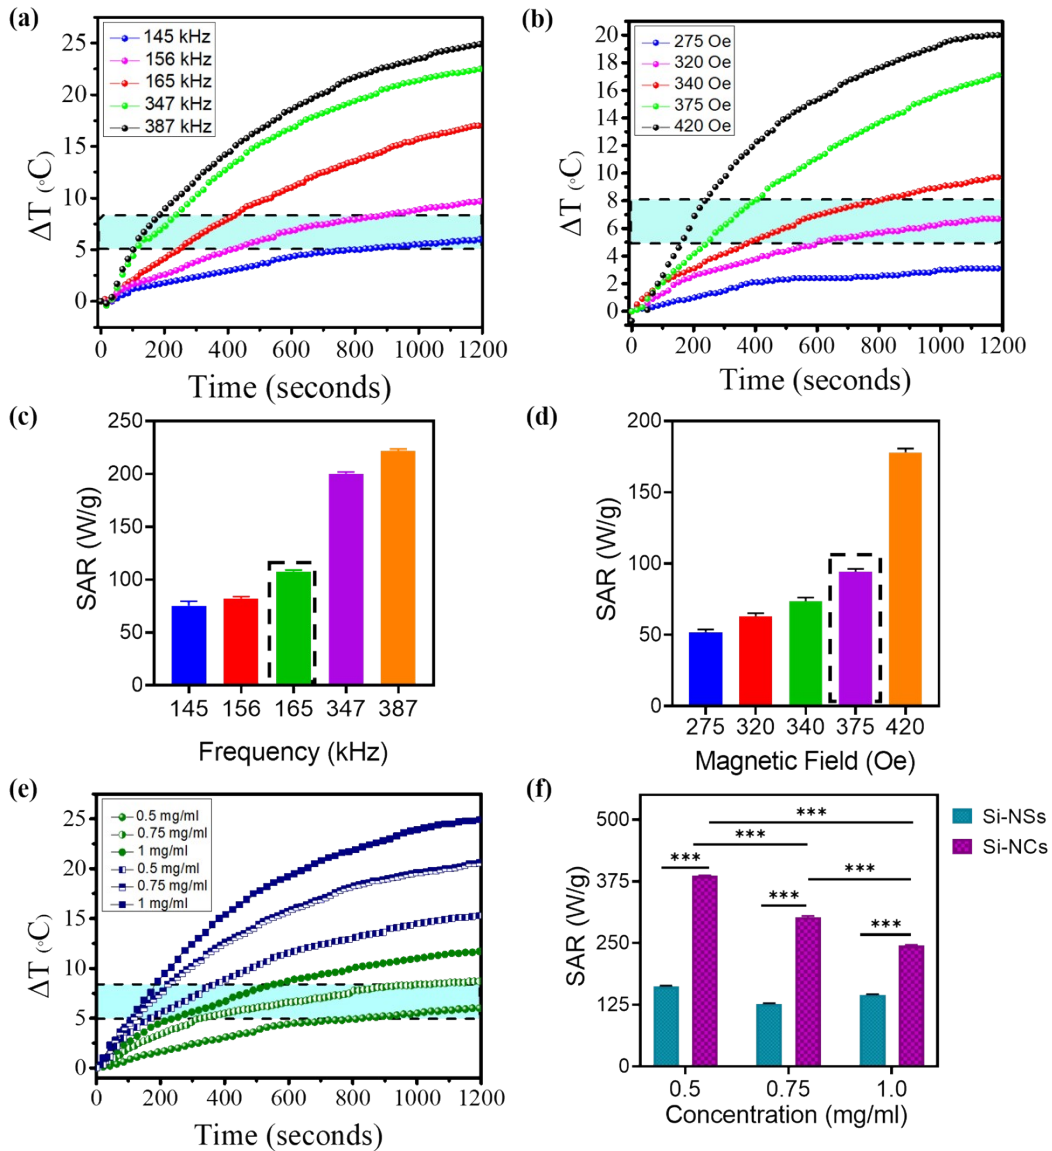

**Figure S3.** (a) Effect of different frequencies and (b) different magnetic field strengths on the hyperthermia potential of the Si-MNPs; (c-d) Specific absorption rate (SAR) at the different magnetic field strengths and frequencies tested in a-b; (e) effect of various concentrations of Si-MNPs on the calorimetric hyperthermia potential; (f) SAR obtained from different Si-MNPs concentrations tested in e.

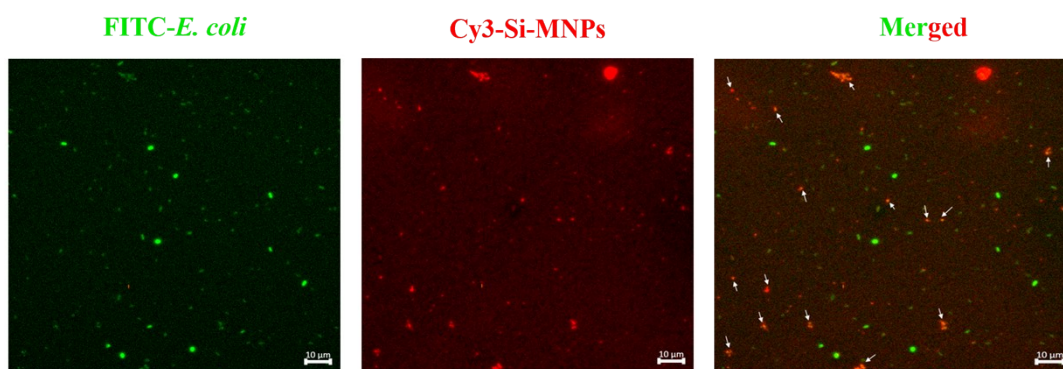

**Figure S4.** Confocal laser scanning microscopy images of FITC-tagged *E. coli* (left), Cy3-tagged Si-MNPs (middle), and merged image showing co-localized signal from BacMags (right). The scale bar = 10  $\mu\text{m}$ .

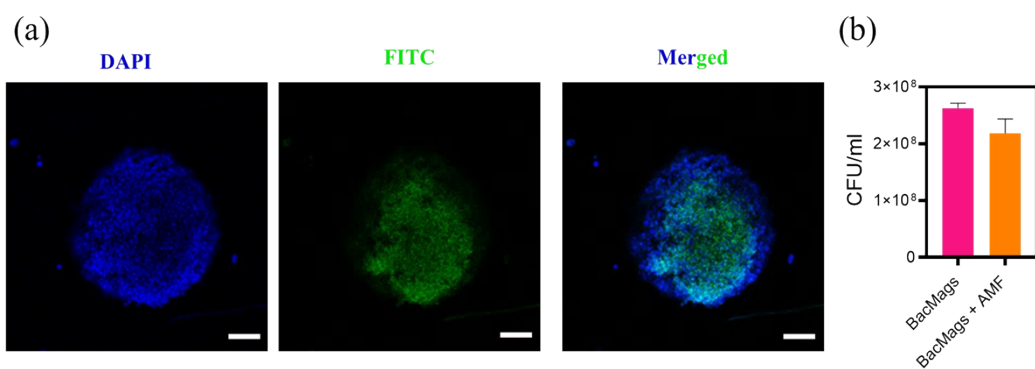

**Figure S5.** Bacterial penetration in 3D-MCTS. (a) Confocal laser scanning microscopy images of DAPI stained nuclei in 3D-MCTS (left), FITC-tagged *E. coli* (middle) and merged image showing localization of BacMags in the cores of 3D-MCTS (right). The scale bar = 100  $\mu\text{m}$ . (b) Quantification of bacteria from disintegrated 3D-MCTS.

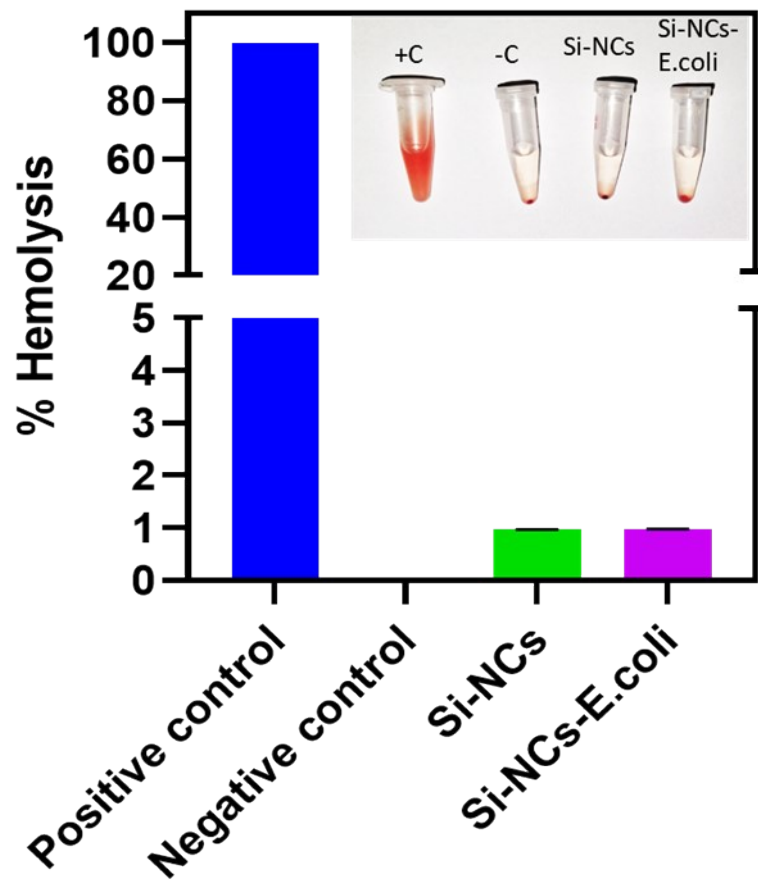

**Figure S6.** Hemocompatibility analysis of Si-NCs and Si-NCs-BacMags. The inset shows digital images of samples incubated with 2% RBCs suspension where + C denotes positive control (distilled water) and - C denotes negative control (PBS).

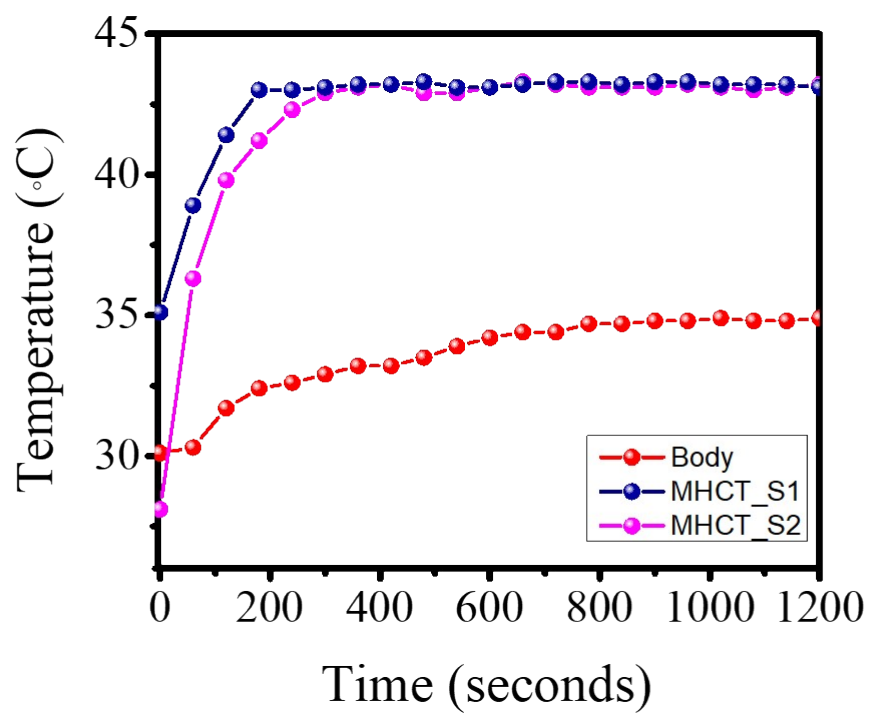

**Figure S7.** Time-dependent temperature profile measured during sessions 1 and 2 of MHCT.
